# Supplementary material for: Transcriptome Profiling of the Theca Interna from Bovine Ovarian Follicles during Atresia
Source: PubMed Central journal article supplement (PMC4067288; doi:10.1371/journal.pone.0099706), 2014-06-23

Scatter plot comparing fold-change values from microarray and qRT-PCR analysis (Pearsons correlation  $R^2 = 0.929$ ,  $P < 0.001$ ).

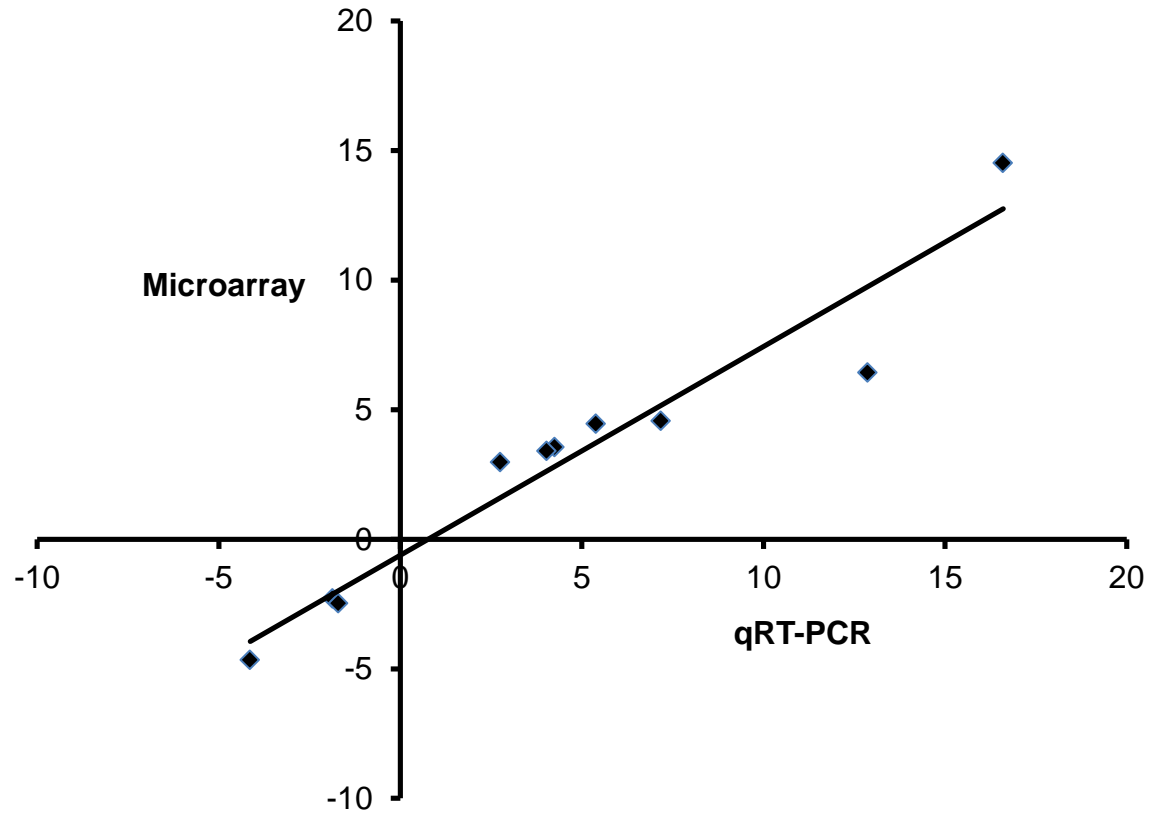

Supplement: pone.0099706.s002.pdf [file pone.0099706.s002.pdf]
