# Supplementary material for: Transcriptome Profiling of the Theca Interna from Bovine Ovarian Follicles during Atresia
Source: PubMed Central journal article supplement (PMC4067288; doi:10.1371/journal.pone.0099706), 2014-06-23
Supplement: pone.0099706.s004.pdf [file pone.0099706.s004.pdf]

**Table S1.** Probe sets which are differentially regulated in atretic with respect to healthy follicles.

| <b>Probe set ID</b> | <b>Gene Symbol</b> | <b>Gene Title</b>                                       | <b>RefSeq Transcript ID</b>   | <b>Fold Change</b> | <b>P Value</b> |
|---------------------|--------------------|---------------------------------------------------------|-------------------------------|--------------------|----------------|
| Bt.13326.1.S1_at    | <i>A2M</i>         | alpha-2-macroglobulin                                   | NM_001109795                  | 3.018              | 9.29E-03       |
| Bt.19199.1.A1_at    | <i>ABCC8</i>       | ATP-binding cassette, sub-family C (CFTR/MRP), member 8 | XM_584132                     | 2.046              | 3.84E-02       |
| Bt.21471.1.S1_at    | <i>ABCG1</i>       | ATP-binding cassette, sub-family G (WHITE), member 1    | XM_587930                     | 2.475              | 1.49E-02       |
| Bt.13293.1.S1_at    | <i>ACOT7</i>       | acyl-CoA thioesterase 7                                 | NM_001075682                  | -2.308             | 1.57E-02       |
| Bt.19884.2.S1_at    | <i>ACP5</i>        | acid phosphatase 5, tartrate resistant                  | XM_595165                     | 3.212              | 5.24E-03       |
| Bt.5215.1.S1_at     | <i>ACP5</i>        | acid phosphatase 5, tartrate resistant                  | XM_595165                     | 2.385              | 6.10E-03       |
| Bt.2657.1.S1_a_at   | <i>ADCY8</i>       | adenylate cyclase 8 (brain)                             | XM_001249965 ///<br>XM_614987 | 2.387              | 1.95E-02       |
| Bt.6202.1.S1_at     | <i>ADM</i>         | adrenomedullin                                          | NM_173888                     | 2.961              | 2.12E-02       |
| Bt.23658.2.S1_at    | <i>AIF1</i>        | allograft inflammatory factor 1                         | NM_173985                     | 2.244              | 6.36E-03       |

|                    |               |                                                            |              |        |          |
|--------------------|---------------|------------------------------------------------------------|--------------|--------|----------|
| Bt.27319.1.A1_at   | <i>ALG13</i>  | asparagine-linked glycosylation 13 homolog (S. cerevisiae) | NM_001080275 | 2.263  | 3.20E-02 |
| Bt.5200.1.S1_at    | <i>ALPL</i>   | alkaline phosphatase, liver/bone/kidney                    | NM_176858    | -2.211 | 2.30E-02 |
| Bt.4507.1.S1_at    | <i>AMY2A</i>  | amylase, alpha 2A (pancreatic)                             | NM_001035016 | 2.208  | 2.47E-02 |
| Bt.16232.1.S1_at   | <i>ANGPT2</i> | angiopoietin 2                                             | NM_001098855 | 2.812  | 1.82E-02 |
| Bt.20272.1.S1_at   | <i>ANLN</i>   | Anillin, actin binding protein                             | XM_596461    | -2.663 | 9.03E-03 |
| Bt.4863.1.S1_at    | <i>ANLN</i>   | anillin, actin binding protein                             | XM_596461    | -2.889 | 1.84E-02 |
| Bt.2112.1.S1_at    | <i>APCDD1</i> | Adenomatosis polyposis coli down-regulated 1               | XM_585921    | 3.127  | 1.04E-02 |
| Bt.24830.1.A1_at   | <i>APLNR</i>  | apelin receptor                                            | NM_001102524 | -2.084 | 4.53E-03 |
| Bt.3686.1.S1_at    | <i>APLNR</i>  | apelin receptor                                            | NM_001102524 | -3.199 | 4.91E-03 |
| Bt.11936.1.S1_a_at | <i>APOD</i>   | Apolipoprotein D                                           | NM_001076301 | 6.763  | 5.16E-03 |
| Bt.16622.1.A1_at   | <i>APOD</i>   | Apolipoprotein D                                           | NM_001076301 | 3.734  | 6.18E-03 |
| Bt.8491.1.S1_at    | <i>APOD</i>   | apolipoprotein D                                           | NM_001076301 | 2.808  | 6.94E-03 |

|                  |                 |                                                                      |              |        |          |
|------------------|-----------------|----------------------------------------------------------------------|--------------|--------|----------|
| Bt.4733.1.S1_at  | <i>APOE</i>     | apolipoprotein E                                                     | NM_173991    | 2.553  | 5.84E-03 |
| Bt.21513.2.S1_at | <i>AQP11</i>    | aquaporin 11                                                         | NM_001110069 | -2.196 | 1.36E-02 |
| Bt.10007.1.A1_at | <i>ARHGEF11</i> | Rho guanine nucleotide exchange factor (GEF) 11                      | XM_588515    | 2.437  | 9.70E-03 |
| Bt.26011.1.A1_at | <i>ARHGEF6</i>  | Rac/Cdc42 guanine nucleotide exchange factor (GEF) 6                 | XM_865157    | 2.191  | 1.40E-02 |
| Bt.666.1.S1_at   | <i>ASF1B</i>    | ASF1 anti-silencing function 1 homolog B (S. cerevisiae)             | NM_001075453 | -2.950 | 7.64E-03 |
| Bt.21523.1.S1_at | <i>ASF1B</i>    | ASF1 anti-silencing function 1 homolog B (S. cerevisiae)             | NM_001075453 | -5.224 | 5.49E-03 |
| Bt.6009.1.S1_at  | <i>ASPA</i>     | aspartoacylase (Canavan disease)                                     | NM_001046033 | 2.631  | 5.16E-03 |
| Bt.16721.1.A1_at | <i>ASPM</i>     | asp (abnormal spindle) homolog, microcephaly associated (Drosophila) | XM_614763    | -5.480 | 4.91E-03 |
| Bt.26895.1.S1_at | <i>ASS1</i>     | argininosuccinate synthase 1                                         | NM_173892    | -2.228 | 4.55E-03 |
| Bt.21028.1.S1_at | <i>ATAD5</i>    | ATPase family, AAA domain containing 5                               | XM_590682    | -2.173 | 3.57E-02 |
| Bt.11428.1.A1_at | <i>ATAD5</i>    | ATPase family, AAA domain containing 5                               | XM_590682    | -2.419 | 2.73E-02 |
| Bt.16725.2.A1_at | <i>ATP2C2</i>   | ATPase, Ca <sup>++</sup> transporting, type 2C, member 2             | XM_587457    | 3.561  | 5.02E-03 |

|                   |              |                                                         |                         |        |          |
|-------------------|--------------|---------------------------------------------------------|-------------------------|--------|----------|
| Bt.21433.2.S1_at  | <i>AURKA</i> | aurora kinase A                                         | NM_001038028            | -3.167 | 7.03E-03 |
| Bt.9510.2.A1_a_at | <i>AURKA</i> | aurora kinase A                                         | NM_001038028            | -3.459 | 9.47E-03 |
| Bt.20521.3.A1_at  | <i>AURKB</i> | aurora kinase B                                         | NM_183084               | -3.047 | 4.91E-03 |
| Bt.16047.1.S1_at  | <i>AURKB</i> | aurora kinase B                                         | NM_183084               | -5.310 | 4.83E-03 |
| Bt.28185.1.S1_at  | <i>BCL6</i>  | B-cell CLL/lymphoma 6                                   | XM_584289 /// XM_865691 | 2.502  | 1.25E-02 |
| Bt.4198.1.S1_at   | <i>BCSIL</i> | BCS1-like (yeast)                                       | NM_001015671            | -2.002 | 1.30E-02 |
| Bt.10503.1.S1_at  | <i>BDHI</i>  | 3-hydroxybutyrate dehydrogenase, type 1                 | NM_001034600            | -2.027 | 3.26E-02 |
| Bt.17939.1.S1_at  | <i>BIRC5</i> | baculoviral IAP repeat-containing 5                     | NM_001001855            | -5.720 | 5.24E-03 |
| Bt.21540.1.S1_at  | <i>BORA</i>  | aurora borealis                                         | XM_591968               | -2.283 | 4.58E-03 |
| Bt.21294.1.A1_at  | <i>BRB</i>   | brain ribonuclease                                      | NM_173891               | 2.093  | 4.14E-02 |
| Bt.12891.1.S1_at  | <i>BRCA1</i> | Breast cancer 1, early onset                            | NM_178573               | -2.650 | 1.46E-02 |
| Bt.27757.1.S1_at  | <i>BUB1</i>  | budding uninhibited by benzimidazoles 1 homolog (yeast) | NM_001102011            | -2.002 | 1.45E-02 |

|                  |                     |                                                              |                               |        |          |
|------------------|---------------------|--------------------------------------------------------------|-------------------------------|--------|----------|
| Bt.17992.1.S1_at | <i>BUB1</i>         | budding uninhibited by benzimidazoles 1 homolog (yeast)      | NM_001102011                  | -5.208 | 5.35E-03 |
| Bt.16875.1.A1_at | <i>BUB1B</i>        | budding uninhibited by benzimidazoles 1 homolog beta (yeast) | NM_001145173 ///<br>XM_617181 | -4.217 | 5.16E-03 |
| Bt.13204.1.S1_at | <i>C13H20ORF108</i> | chromosome 20 open reading frame 108 ortholog                | NM_001080278                  | 2.109  | 5.63E-03 |
| Bt.27043.1.A1_at | <i>C13H20ORF12</i>  | chromosome 20 open reading frame 12 ortholog                 | NM_001076838                  | 2.505  | 9.28E-03 |
| Bt.21886.1.S1_at | <i>C1H21ORF7</i>    | chromosome 21 open reading frame 7 ortholog                  | XM_613553                     | 2.715  | 1.74E-02 |
| Bt.1190.1.A1_at  | <i>CIQA</i>         | complement component 1, q subcomponent, A chain              | NM_001014945                  | 2.525  | 6.91E-03 |
| Bt.24238.1.A1_at | <i>CIQB</i>         | complement component 1, q subcomponent, B chain              | NM_001046599                  | 2.730  | 5.61E-03 |
| Bt.23532.1.S1_at | <i>CIQC</i>         | complement component 1, q subcomponent, C chain              | XM_587039                     | 2.786  | 6.22E-03 |
| Bt.4872.1.S1_at  | <i>CIQTNF7</i>      | C1q and tumor necrosis factor related protein 7              | NM_001076201                  | 2.075  | 2.45E-02 |
| Bt.20501.1.S1_at | <i>CIR</i>          | complement component 1, r subcomponent                       | NM_001034407                  | 4.172  | 5.49E-03 |
| Bt.24446.1.A1_at | <i>CIS</i>          | complement component 1, s subcomponent                       | NM_001076550                  | 7.038  | 5.45E-03 |
| Bt.9175.1.A1_at  | <i>C28H10ORF10</i>  | chromosome 10 open reading frame 10 ortholog                 | NM_001046515                  | 4.122  | 6.99E-03 |

|                  |                                      |                                                                     |                               |        |          |
|------------------|--------------------------------------|---------------------------------------------------------------------|-------------------------------|--------|----------|
| Bt.13796.1.S1_at | <i>C4A</i>                           | complement component 4A                                             | NM_001166485 ///<br>XM_584742 | 2.736  | 7.30E-03 |
| Bt.23521.1.S1_at | <i>C7</i>                            | complement component 7                                              | NM_001045966                  | 4.378  | 6.92E-03 |
| Bt.18895.1.A1_at | <i>C9orf100</i>                      | vav-like protein C9orf100 homolog                                   | NM_001079800                  | -3.122 | 1.32E-02 |
| Bt.7190.1.S1_at  | <i>CABC1</i>                         | chaperone, ABC1 activity of bc1 complex homolog ( <i>S. pombe</i> ) | NM_001046419                  | 2.031  | 1.08E-02 |
| Bt.3191.1.A1_at  | <i>CASC5</i>                         | cancer susceptibility candidate 5                                   | XM_001790629                  | -4.950 | 5.45E-03 |
| Bt.27207.1.A1_at | <i>CCDC115</i>                       | coiled-coil domain containing 115                                   | NM_001034444                  | -2.024 | 7.74E-03 |
| Bt.719.1.A1_at   | <i>CCDC99</i>                        | coiled-coil domain containing 99                                    | NM_001076854                  | -3.834 | 9.91E-03 |
| Bt.2047.1.S1_at  | <i>CCL25</i>                         | chemokine (C-C motif) ligand 25                                     | NM_001046569                  | -2.892 | 1.95E-02 |
| Bt.4310.1.A1_at  | <i>CCNA2</i> ///<br><i>LOC786906</i> | cyclin A2 /// similar to Cyclin A2                                  | NM_001075123 ///<br>XR_042775 | -4.669 | 5.99E-03 |
| Bt.20220.1.S1_at | <i>CCNB1</i>                         | cyclin B1                                                           | NM_001045872                  | -7.018 | 5.53E-03 |
| Bt.28541.1.S1_at | <i>CCNB2</i>                         | cyclin B2                                                           | NM_174264                     | -5.139 | 4.91E-03 |
| Bt.17994.1.S1_at | <i>CCNE2</i>                         | cyclin E2                                                           | NM_001015665                  | -2.296 | 8.91E-03 |

|                    |              |                                                         |              |        |          |
|--------------------|--------------|---------------------------------------------------------|--------------|--------|----------|
| Bt.16886.1.A1_a_at | <i>CCNF</i>  | cyclin F                                                | NM_001098870 | -3.611 | 5.24E-03 |
| Bt.4873.1.S1_at    | <i>CCR1</i>  | chemokine (C-C motif) receptor 1                        | NM_001077839 | 2.834  | 4.55E-03 |
| Bt.25823.1.A1_at   | <i>CD14</i>  | CD14 molecule                                           | NM_174008    | 4.686  | 5.24E-03 |
| Bt.24258.2.S1_at   | <i>CD14</i>  | CD14 molecule                                           | NM_174008    | 2.393  | 6.36E-03 |
| Bt.24707.1.S1_at   | <i>CD36</i>  | CD36 molecule (thrombospondin receptor)                 | NM_174010    | 3.546  | 1.09E-02 |
| Bt.20827.1.A1_at   | <i>CD48</i>  | CD48 molecule                                           | NM_001046002 | 2.418  | 1.89E-02 |
| Bt.8834.1.S1_at    | <i>CD53</i>  | CD53 molecule                                           | NM_001034232 | 2.912  | 1.21E-02 |
| Bt.16094.1.S1_at   | <i>CD5L</i>  | CD5 molecule-like                                       | NM_001102119 | 2.708  | 3.05E-02 |
| Bt.18639.1.A1_at   | <i>CD68</i>  | CD68 molecule                                           | NM_001045902 | 6.423  | 5.06E-03 |
| Bt.26844.1.A1_at   | <i>CD84</i>  | CD84 molecule                                           | XM_588136    | 2.116  | 2.22E-02 |
| Bt.13798.1.S1_at   | <i>CD86</i>  | CD86 molecule                                           | NM_001038017 | 2.236  | 4.55E-03 |
| Bt.12685.1.S1_at   | <i>CDC20</i> | cell division cycle 20 homolog ( <i>S. cerevisiae</i> ) | NM_001082436 | -5.193 | 4.91E-03 |

|                   |               |                                                        |              |        |          |
|-------------------|---------------|--------------------------------------------------------|--------------|--------|----------|
| Bt.18500.1.A1_at  | <i>CDC25C</i> | cell division cycle 25 homolog C ( <i>S. pombe</i> )   | NM_001097996 | -2.098 | 9.71E-03 |
| Bt.7043.2.S1_a_at | <i>CDC6</i>   | cell division cycle 6 homolog ( <i>S. cerevisiae</i> ) | XM_593299    | -2.222 | 2.10E-02 |
| Bt.28797.2.S1_at  | <i>CDC6</i>   | cell division cycle 6 homolog ( <i>S. cerevisiae</i> ) | XM_593299    | -3.220 | 2.31E-02 |
| Bt.546.1.S1_at    | <i>CDCA2</i>  | cell division cycle associated 2                       | NM_001046194 | -5.729 | 4.91E-03 |
| Bt.28379.1.S1_at  | <i>CDCA3</i>  | cell division cycle associated 3                       | NM_001035449 | -5.264 | 4.83E-03 |
| Bt.1181.1.S1_at   | <i>CDCA5</i>  | cell division cycle associated 5                       | NM_001076270 | -5.371 | 5.86E-03 |
| Bt.24288.2.S1_at  | <i>CDCA7</i>  | cell division cycle associated 7                       | NM_001037488 | -3.853 | 1.67E-02 |
| Bt.26844.2.S1_at  | <i>CDCA8</i>  | cell division cycle associated 8                       | NM_001083652 | -2.701 | 1.05E-02 |
| Bt.25924.1.A1_at  | <i>CDCA8</i>  | cell division cycle associated 8                       | NM_001083652 | -6.156 | 6.57E-03 |
| Bt.23453.1.S1_at  | <i>CDK1</i>   | cyclin-dependent kinase 1                              | NM_174016    | -5.495 | 6.17E-03 |
| Bt.29477.1.A1_at  | <i>CDT1</i>   | chromatin licensing and DNA replication factor 1       | XM_597224    | -2.413 | 1.20E-02 |
| Bt.12565.1.S1_at  | <i>CEBPD</i>  | CCAAT/enhancer binding protein (C/EBP), delta          | NM_174267    | 4.176  | 9.49E-03 |



|                    |                                                                                                                                    |                                                                                  |                                                                                              |        |          |
|--------------------|------------------------------------------------------------------------------------------------------------------------------------|----------------------------------------------------------------------------------|----------------------------------------------------------------------------------------------|--------|----------|
| Bt.18639.2.S1_at   | <i>CEBPD</i>                                                                                                                       | CCAAT/enhancer binding protein (C/EBP), delta                                    | NM_174267                                                                                    | 3.270  | 1.06E-02 |
| Bt.27849.2.S1_a_at | <i>CENP-A</i> ///<br><i>CENP-A</i> ///<br><i>LOC618307</i> ///<br><i>LOC782601</i> ///<br><i>LOC782634</i> ///<br><i>LOC782883</i> | centromere protein-A /// CENP-A protein /// similar to Histone H3-like centromer | XM_001250060 ///<br>XM_001250108 ///<br>XM_001250161 ///<br>XM_001250208 ///<br>XM_001788955 | -3.898 | 4.91E-03 |
| Bt.29005.1.A1_at   | <i>CENP-A</i> ///<br><i>LOC782601</i> ///<br><i>LOC782883</i>                                                                      | CENP-A protein /// similar to Histone H3-like centromeric protein A (Centromere  | XM_001250060 ///<br>XM_001250108 ///<br>XM_001788955 ///<br>XR_027462                        | -5.217 | 4.83E-03 |
| Bt.1074.1.A1_a_at  | <i>CENPF</i>                                                                                                                       | centromere protein F, 350/400ka (mitosin)                                        | XM_612376                                                                                    | -4.666 | 4.91E-03 |
| Bt.27798.1.A1_at   | <i>CENPN</i>                                                                                                                       | centromere protein N                                                             | NM_001038099                                                                                 | -3.937 | 7.03E-03 |
| Bt.26157.1.A1_at   | <i>CENPN</i>                                                                                                                       | centromere protein N                                                             | NM_001038099                                                                                 | -4.915 | 5.45E-03 |
| Bt.13670.1.S2_at   | <i>CENPN</i>                                                                                                                       | centromere protein N                                                             | NM_001038099                                                                                 | -5.759 | 6.74E-03 |
| Bt.24859.2.S1_at   | <i>CENPO</i>                                                                                                                       | centromere protein O                                                             | NM_001077003                                                                                 | -2.198 | 1.78E-02 |
| Bt.24266.1.A1_at   | <i>CENPP</i>                                                                                                                       | centromere protein P                                                             | NM_001105615                                                                                 | -2.710 | 1.34E-02 |

|                    |               |                                                                                    |                                  |        |          |
|--------------------|---------------|------------------------------------------------------------------------------------|----------------------------------|--------|----------|
| Bt.17926.1.A1_at   | <i>CFI</i>    | complement factor I                                                                | NM_001038096                     | 5.113  | 4.91E-03 |
| Bt.18116.3.A1_s_at | <i>CH25H</i>  | cholesterol 25-hydroxylase                                                         | NM_001075243                     | 4.124  | 1.69E-02 |
| Bt.12465.1.A1_at   | <i>CHAF1A</i> | chromatin assembly factor 1, subunit A (p150)                                      | NM_001101842                     | -3.311 | 1.08E-02 |
| Bt.1052.1.A1_at    | <i>CHAF1B</i> | chromatin assembly factor 1, subunit B (p60)                                       | NM_001098014                     | -2.364 | 2.26E-02 |
| Bt.13546.1.A1_at   | <i>CHEK1</i>  | CHK1 checkpoint homolog ( <i>S. pombe</i> )                                        | NM_001098023                     | -2.752 | 2.63E-02 |
| Bt.7588.1.A1_at    | <i>CHI3L2</i> | similar to chitinase 3-like 2                                                      | XR_042527                        | 2.826  | 1.30E-02 |
| Bt.24354.1.S1_at   | <i>CTF18</i>  | CTF18, chromosome transmission fidelity factor 18 homolog ( <i>S. cerevisiae</i> ) | XM_595170                        | -2.505 | 2.22E-02 |
| Bt.4615.1.S1_at    | <i>CITED2</i> | Cbp/p300-interacting transactivator, with Glu/Asp-rich carboxy-terminal domain,    | NM_001075819                     | 2.209  | 2.18E-02 |
| Bt.26029.1.A1_at   | <i>CKAP2</i>  | cytoskeleton associated protein 2                                                  | NM_001098032                     | -3.153 | 5.86E-03 |
| Bt.22389.1.S1_at   | <i>CKAP2L</i> | cytoskeleton associated protein 2-like                                             | NM_001098901 ///<br>XM_584116    | -3.843 | 5.24E-03 |
| Bt.19204.1.S1_at   | <i>CKS1B</i>  | CDC28 protein kinase regulatory subunit 1B                                         | NM_001113311 ///<br>XM_001789781 | -2.502 | 2.07E-02 |
| Bt.24370.1.A1_at   | <i>CKS2</i>   | CDC28 protein kinase regulatory subunit 2                                          | NM_001113319 ///<br>XM_001252074 | -4.013 | 5.16E-03 |

|                    |               |                                                  |              |        |          |
|--------------------|---------------|--------------------------------------------------|--------------|--------|----------|
| Bt.393.1.S2_at     | <i>CLDN11</i> | claudin 11                                       | NM_001035055 | 4.562  | 4.84E-02 |
| Bt.20428.2.S1_a_at | <i>CLDN5</i>  | claudin 5                                        | NM_001076460 | 2.525  | 1.14E-02 |
| Bt.12916.1.S1_at   | <i>CLU</i>    | clusterin                                        | NM_173902    | 2.062  | 2.69E-02 |
| Bt.1185.2.S1_at    | <i>CNDP2</i>  | CNDP dipeptidase 2 (metallopeptidase M20 family) | NM_001035108 | 2.025  | 6.27E-03 |
| Bt.986.1.A1_at     | <i>COL4A6</i> | collagen, type IV, alpha 6                       | XM_601826    | 2.091  | 3.12E-02 |
| Bt.26683.2.S1_at   | <i>CORO1A</i> | coronin, actin binding protein, 1A               | NM_174521    | 2.087  | 1.18E-02 |
| Bt.20784.1.A1_at   | <i>CP</i>     | ceruloplasmin (ferroxidase)                      | XM_592003    | 3.176  | 1.94E-02 |
| Bt.7331.1.S1_at    | <i>CP</i>     | ceruloplasmin (ferroxidase)                      | XM_592003    | 2.891  | 9.03E-03 |
| Bt.13289.2.S1_at   | <i>CP</i>     | ceruloplasmin (ferroxidase)                      | XM_592003    | 2.435  | 7.52E-03 |
| Bt.20836.1.S1_at   | <i>CRYM</i>   | crystallin, mu                                   | NM_001045914 | -2.202 | 3.71E-02 |
| Bt.13413.2.A1_at   | <i>CSTB</i>   | cystatin B (stefin B)                            | NM_001100362 | 2.625  | 2.00E-02 |
| Bt.28225.2.S1_at   | <i>CTSB</i>   | cathepsin B                                      | NM_174031    | 2.936  | 4.53E-03 |

|                  |                |                                                        |              |        |          |
|------------------|----------------|--------------------------------------------------------|--------------|--------|----------|
| Bt.6800.1.A1_at  | <i>CTSB</i>    | cathepsin B                                            | NM_174031    | 2.498  | 4.55E-03 |
| Bt.9807.1.S1_at  | <i>CTSB</i>    | Cathepsin B                                            | NM_174031    | 2.345  | 4.53E-03 |
| Bt.27826.1.S1_at | <i>CTSF</i>    | cathepsin F                                            | NM_001075416 | 2.321  | 7.64E-03 |
| Bt.13834.1.S1_at | <i>CTSW</i>    | cathepsin W                                            | NM_001110070 | 2.221  | 2.29E-02 |
| Bt.284.1.S1_at   | <i>CTSZ</i>    | cathepsin Z                                            | NM_001077835 | 2.103  | 5.16E-03 |
| Bt.9863.1.S1_at  | <i>CXCL14</i>  | chemokine (C-X-C motif) ligand 14                      | NM_001034410 | -3.679 | 5.06E-03 |
| Bt.1185.1.A1_at  | <i>CXCR4</i>   | chemokine (C-X-C motif) receptor 4                     | NM_174301    | 3.909  | 6.84E-03 |
| Bt.13387.1.S1_at | <i>CYB5R3</i>  | cytochrome b5 reductase 3                              | NM_001103250 | -2.165 | 5.02E-03 |
| Bt.28366.2.S1_at | <i>CYBB</i>    | cytochrome b-245, beta polypeptide                     | NM_174035    | 2.200  | 4.91E-03 |
| Bt.16058.2.S1_at | <i>CYP11A1</i> | cytochrome P450, family 11, subfamily A, polypeptide 1 | NM_176644    | -2.485 | 1.17E-02 |
| Bt.14371.1.A1_at | <i>DCK</i>     | deoxycytidine kinase                                   | NM_001034573 | -2.349 | 2.59E-02 |
| Bt.16538.2.A1_at | <i>DCLK1</i>   | Doublecortin-like kinase 1                             | NM_001109962 | 2.357  | 4.91E-03 |

|                   |                |                                                                            |              |        |          |
|-------------------|----------------|----------------------------------------------------------------------------|--------------|--------|----------|
| Bt.27600.1.A1_at  | <i>DDX39</i>   | DEAD (Asp-Glu-Ala-Asp) box polypeptide 39                                  | NM_001034752 | -2.557 | 1.62E-02 |
| Bt.24218.1.S1_at  | <i>DSN1</i>    | DSN1, MIND kinetochore complex component, homolog ( <i>S. cerevisiae</i> ) | NM_001100323 | -3.164 | 1.51E-02 |
| Bt.22672.1.A1_at  | <i>DTYMK</i>   | deoxythymidylate kinase (thymidylate kinase)                               | NM_001098893 | -3.118 | 1.26E-02 |
| Bt.1920.2.S1_at   | <i>DUSP26</i>  | dual specificity phosphatase 26 (putative)                                 | NM_001076004 | 2.339  | 4.55E-03 |
| Bt.5536.1.S1_at   | <i>DUT</i>     | deoxyuridine triphosphatase                                                | NM_001077873 | -2.586 | 4.55E-03 |
| Bt.964.1.S1_at    | <i>DUT</i>     | deoxyuridine triphosphatase                                                | NM_001077873 | -2.708 | 4.53E-03 |
| Bt.9807.2.S1_at   | <i>DYNLRB2</i> | dynein, light chain, roadblock-type 2                                      | NM_001077119 | 2.343  | 5.99E-03 |
| Bt.18081.1.A1_at  | <i>E2F8</i>    | E2F transcription factor 8                                                 | XM_001254260 | -3.813 | 9.95E-03 |
| Bt.1088.1.S1_a_at | <i>ECT2</i>    | epithelial cell transforming sequence 2 oncogene                           | NM_001097573 | -3.206 | 7.36E-03 |
| Bt.28826.1.A1_at  | <i>ECT2</i>    | epithelial cell transforming sequence 2 oncogene                           | NM_001097573 | -3.508 | 5.16E-03 |
| Bt.3863.1.S1_at   | <i>EGR1</i>    | early growth response 1                                                    | NM_001045875 | 2.297  | 2.71E-02 |
| Bt.1296.2.S1_at   | <i>ENPP2</i>   | ectonucleotide pyrophosphatase/phosphodiesterase 2                         | NM_001080293 | 2.301  | 1.99E-02 |

|                    |                                      |                                                                                     |                                  |        |          |
|--------------------|--------------------------------------|-------------------------------------------------------------------------------------|----------------------------------|--------|----------|
| Bt.13476.1.S1_at   | <i>EPHX2</i> ///<br><i>LOC785508</i> | epoxide hydrolase 2, cytoplasmic /// similar to<br>epoxide hydrolase 2, cytoplasmic | NM_001075534 ///<br>XM_001253506 | 2.388  | 1.95E-02 |
| Bt.3371.1.S1_at    | <i>ERCC6L</i>                        | excision repair cross-complementing rodent<br>repair deficiency, complementation gr | NM_001102530                     | -3.228 | 1.46E-02 |
| Bt.28243.2.S1_at   | <i>ESPL1</i>                         | extra spindle pole bodies homolog 1 (S.<br>cerevisiae)                              | NM_001045949 ///<br>XM_001790117 | -5.224 | 5.24E-03 |
| Bt.12876.3.S1_a_at | <i>EZH2</i>                          | enhancer of zeste homolog 2 (Drosophila)                                            | XM_585997 /// XM_865659          | -2.122 | 5.74E-03 |
| Bt.12295.1.S1_at   | <i>FABP5</i>                         | fatty acid binding protein 5 (psoriasis-<br>associated)                             | NM_174315                        | 2.512  | 4.26E-02 |
| Bt.29850.1.S1_at   | <i>FAM83D</i>                        | Protein FAM83D                                                                      | NM_001083393                     | -3.747 | 5.16E-03 |
| Bt.7058.1.S1_at    | <i>FAM84A</i>                        | family with sequence similarity 84, member A                                        | NM_001034659                     | 2.053  | 5.24E-03 |
| Bt.13865.1.A1_at   | <i>FANCI</i>                         | Fanconi anemia, complementation group I                                             | XM_600723                        | -3.179 | 1.30E-02 |
| Bt.1742.2.S1_a_at  | <i>FBXO32</i>                        | F-box protein 32                                                                    | NM_001046155                     | 2.640  | 2.20E-02 |
| Bt.4995.1.A1_at    | <i>FBXO32</i>                        | F-box protein 32                                                                    | NM_001046155                     | 2.102  | 4.10E-02 |
| Bt.5373.1.S1_at    | <i>FBXO5</i>                         | F-box protein 5                                                                     | NM_001082435                     | -3.238 | 9.90E-03 |
| Bt.24600.1.S1_at   | <i>FCERIA</i>                        | Fc fragment of IgE, high affinity I, receptor<br>for; alpha polypeptide             | NM_001100310                     | 2.073  | 5.24E-03 |

|                  |                  |                                                       |                               |        |          |
|------------------|------------------|-------------------------------------------------------|-------------------------------|--------|----------|
| Bt.6687.1.S1_at  | <i>FCGR1A</i>    | Fc fragment of IgG, high affinity Ia, receptor (CD64) | NM_174538                     | 2.470  | 9.27E-03 |
| Bt.20677.1.S1_at | <i>FEN1</i>      | flap structure-specific endonuclease 1                | NM_001035113                  | -2.876 | 1.29E-02 |
| Bt.28799.1.S1_at | <i>FERMT3</i>    | fermitin family homolog 3 (Drosophila)                | NM_001037606                  | 2.220  | 6.18E-03 |
| Bt.20262.1.S1_at | <i>FGFR2</i>     | fibroblast growth factor receptor 2                   | XM_001789706                  | -2.251 | 1.59E-02 |
| Bt.26683.1.S1_at | <i>FGL1</i>      | fibrinogen-like 1                                     | NM_001034313                  | 2.259  | 8.70E-03 |
| Bt.12744.1.S1_at | <i>FGL2</i>      | fibrinogen-like 2                                     | NM_001046097                  | 2.731  | 1.48E-02 |
| Bt.8718.1.S1_at  | <i>FOLR2</i>     | folate receptor 2 (fetal)                             | NM_001075325                  | 3.294  | 4.91E-03 |
| Bt.28225.1.A1_at | <i>FOS</i>       | FBJ murine osteosarcoma viral oncogene homolog        | NM_182786                     | 3.101  | 3.25E-02 |
| Bt.17915.1.S1_at | <i>FOS</i>       | FBJ murine osteosarcoma viral oncogene homolog        | NM_182786                     | 3.083  | 4.14E-02 |
| Bt.25478.1.A1_at | <i>FOSL2</i>     | FOS-like antigen 2                                    | XM_864138                     | 3.101  | 6.90E-03 |
| Bt.15682.1.A1_at | <i>FOXMI</i>     | forkhead box M1                                       | XM_001249704 ///<br>XM_872119 | -2.082 | 1.56E-02 |
| Bt.28409.1.A1_at | <i>GABARAPL1</i> | GABA(A) receptor-associated protein like 1            | NM_001033616                  | 2.048  | 8.94E-03 |

|                  |               |                                                      |              |        |          |
|------------------|---------------|------------------------------------------------------|--------------|--------|----------|
| Bt.20431.1.A1_at | <i>GAMT</i>   | guanidinoacetate N-methyltransferase                 | NM_001038544 | 2.058  | 2.33E-02 |
| Bt.6406.1.S3_at  | <i>GAS7</i>   | growth arrest-specific 7                             | NM_001102280 | 2.086  | 7.74E-03 |
| Bt.1220.1.S1_at  | <i>GEM</i>    | GTP binding protein overexpressed in skeletal muscle | NM_001083732 | 2.248  | 2.05E-02 |
| Bt.13336.2.S1_at | <i>GIMAP7</i> | GTPase, IMAP family member 7                         | NM_001080257 | 2.451  | 2.54E-02 |
| Bt.2520.1.S1_at  | <i>GIMAP7</i> | GTPase, IMAP family member 7                         | NM_001080257 | 2.263  | 3.09E-02 |
| Bt.7620.1.S1_at  | <i>GINS3</i>  | GINS complex subunit 3 (Psf3 homolog)                | NM_001076136 | -2.142 | 8.03E-03 |
| Bt.12961.1.A1_at | <i>GINS3</i>  | GINS complex subunit 3 (Psf3 homolog)                | NM_001076136 | -2.165 | 1.33E-02 |
| Bt.10510.1.S1_at | <i>GMFG</i>   | glia maturation factor, gamma                        | NM_001024537 | 2.137  | 6.18E-03 |
| Bt.4817.1.A1_at  | <i>GPNMB</i>  | glycoprotein (transmembrane) nmb                     | NM_001038065 | 14.505 | 6.44E-03 |
| Bt.11936.1.S1_at | <i>GPNMB</i>  | glycoprotein (transmembrane) nmb                     | NM_001038065 | 3.906  | 7.41E-03 |
| Bt.26415.1.A1_at | <i>GPNMB</i>  | glycoprotein (transmembrane) nmb                     | NM_001038065 | 2.139  | 1.84E-02 |
| Bt.6397.1.S1_at  | <i>GPR77</i>  | G protein-coupled receptor 77                        | NM_001077947 | 2.265  | 4.04E-02 |



|                   |              |                                               |              |        |          |
|-------------------|--------------|-----------------------------------------------|--------------|--------|----------|
| Bt.17488.1.A1_at  | <i>GPX3</i>  | glutathione peroxidase 3 (plasma)             | NM_174077    | 3.394  | 6.17E-03 |
| Bt.2111.1.S1_a_at | <i>H2AFX</i> | H2A histone family, member X                  | NM_001079780 | -2.831 | 8.94E-03 |
| Bt.21546.1.S1_at  | <i>H2AFZ</i> | H2A histone family, member Z                  | NM_174809    | -2.029 | 1.61E-02 |
| Bt.7035.1.S1_at   | <i>HJURP</i> | Holliday junction recognition protein         | XM_869720    | -5.629 | 4.91E-03 |
| Bt.15733.1.A1_at  | <i>HMGB2</i> | High-mobility group box 2                     | NM_001037616 | -2.001 | 6.81E-03 |
| Bt.11497.1.A1_at  | <i>HMGB2</i> | high-mobility group box 2                     | NM_001037616 | -2.345 | 5.49E-03 |
| Bt.20499.1.S1_at  | <i>HMMR</i>  | hyaluronan-mediated motility receptor (RHAMM) | XM_590028    | -2.058 | 1.33E-02 |
| Bt.19819.1.S1_at  | <i>HMMR</i>  | hyaluronan-mediated motility receptor (RHAMM) | XM_590028    | -3.575 | 5.84E-03 |
| Bt.1343.2.A1_at   | <i>HMOX1</i> | heme oxygenase (decycling) 1                  | NM_001014912 | 2.378  | 8.78E-03 |
| Bt.21939.1.S1_at  | <i>HNI</i>   | hematological and neurological expressed 1    | NM_001034734 | -2.315 | 1.43E-02 |
| Bt.9155.1.A1_at   | <i>HPGD</i>  | hydroxyprostaglandin dehydrogenase 15-(NAD)   | NM_001034419 | -2.402 | 2.10E-02 |
| Bt.2556.1.S1_at   | <i>HPGD</i>  | hydroxyprostaglandin dehydrogenase 15-(NAD)   | NM_001034419 | -3.001 | 2.09E-02 |

|                    |                 |                                                                    |                               |        |          |
|--------------------|-----------------|--------------------------------------------------------------------|-------------------------------|--------|----------|
| Bt.9997.1.S1_at    | <i>HRH1</i>     | histamine receptor H1                                              | NM_174083                     | 2.068  | 6.84E-03 |
| Bt.3560.1.S1_at    | <i>HSD17B11</i> | hydroxysteroid (17-beta) dehydrogenase 11                          | NM_001046286                  | 2.417  | 1.24E-02 |
| Bt.2410.1.A1_at    | <i>IL1R1</i>    | interleukin 1 receptor, type I                                     | XM_593695                     | 2.265  | 4.55E-03 |
| Bt.5193.1.S1_at    | <i>IL6</i>      | interleukin 6 (interferon, beta 2)                                 | NM_173923                     | 2.630  | 2.38E-02 |
| Bt.15739.1.S1_at   | <i>IQCA1</i>    | IQ motif containing with AAA domain 1                              | XM_001790491 ///<br>XM_870442 | 2.080  | 5.16E-03 |
| Bt.17513.1.A1_at   | <i>IQGAP3</i>   | IQ motif containing GTPase activating protein 3                    | NM_001098880                  | -2.691 | 5.49E-03 |
| Bt.2334.1.S1_at    | <i>ISM1</i>     | isthmin 1 homolog (zebrafish)                                      | NM_001163935 ///<br>XM_583413 | 2.799  | 2.27E-02 |
| Bt.6456.1.A1_at    | <i>ITGB2</i>    | integrin, beta 2 (complement component 3 receptor 3 and 4 subunit) | NM_175781                     | 2.152  | 7.59E-03 |
| Bt.10816.1.S1_s_at | <i>ITGB5</i>    | integrin, beta 5                                                   | NM_174679                     | 2.216  | 2.78E-02 |
| Bt.26660.1.S1_at   | <i>JUN</i>      | jun oncogene                                                       | NM_001077827                  | 2.609  | 1.51E-02 |
| Bt.22083.2.S1_at   | <i>JUN</i>      | jun oncogene                                                       | NM_001077827                  | 2.232  | 2.69E-02 |
| Bt.28037.1.S1_at   | <i>KANK1</i>    | KN motif and ankyrin repeat domains 1                              | XM_614789                     | 2.009  | 1.99E-02 |

|                  |               |                                                                                  |              |        |          |
|------------------|---------------|----------------------------------------------------------------------------------|--------------|--------|----------|
| Bt.22460.1.S2_at | <i>KCNMA1</i> | potassium large conductance calcium-activated channel, subfamily M, alpha member | NM_174680    | -3.274 | 2.22E-02 |
| Bt.4631.2.S1_at  | <i>KIF20A</i> | kinesin family member 20A                                                        | NM_001046288 | -3.719 | 4.94E-03 |
| Bt.278.1.S1_at   | <i>KIF20A</i> | kinesin family member 20A                                                        | NM_001046288 | -5.109 | 5.24E-03 |
| Bt.10253.1.A1_at | <i>KIF22</i>  | kinesin family member 22                                                         | NM_001101868 | -3.505 | 5.26E-03 |
| Bt.19274.1.A1_at | <i>KIF23</i>  | kinesin family member 23                                                         | NM_001098038 | -3.013 | 5.84E-03 |
| Bt.26952.1.S1_at | <i>KIF2C</i>  | kinesin family member 2C                                                         | NM_001101147 | -2.232 | 5.53E-03 |
| Bt.22869.1.S1_at | <i>KIF2C</i>  | kinesin family member 2C                                                         | NM_001101147 | -5.024 | 6.17E-03 |
| Bt.1978.1.S1_at  | <i>KIF4A</i>  | kinesin family member 4A                                                         | XM_617283    | -3.753 | 5.31E-03 |
| Bt.2353.1.S1_at  | <i>KIFC1</i>  | kinesin family member C1                                                         | NM_001101936 | -3.286 | 5.49E-03 |
| Bt.351.1.S1_at   | <i>KLF15</i>  | Kruppel-like factor 15                                                           | NM_001082425 | 2.106  | 1.37E-02 |
| Bt.17821.3.A1_at | <i>KLHL24</i> | kelch-like 24 (Drosophila)                                                       | XM_866793    | 2.098  | 3.75E-02 |
| Bt.6441.1.S1_at  | <i>KNTC1</i>  | kinetochore associated 1                                                         | XM_582786    | -3.620 | 8.11E-03 |

|                    |                                                                                                                                                                       |                                                                                     |                                                                                              |        |          |
|--------------------|-----------------------------------------------------------------------------------------------------------------------------------------------------------------------|-------------------------------------------------------------------------------------|----------------------------------------------------------------------------------------------|--------|----------|
| Bt.12504.1.S1_at   | <i>KPNA2</i>                                                                                                                                                          | karyopherin alpha 2 (RAG cohort 1, importin alpha 1)                                | NM_001034449                                                                                 | -3.723 | 5.16E-03 |
| Bt.13975.2.A1_at   | <i>LAPTM5</i>                                                                                                                                                         | lysosomal protein transmembrane 5                                                   | NM_001046118                                                                                 | 2.369  | 6.94E-03 |
| Bt.5193.2.S1_a_at  | <i>LCPI</i>                                                                                                                                                           | lymphocyte cytosolic protein 1 (L-plastin)                                          | NM_001034720                                                                                 | 2.533  | 4.91E-03 |
| Bt.12217.1.S1_at   | <i>LGALS3</i>                                                                                                                                                         | lectin, galactoside-binding, soluble, 3                                             | NM_001102341                                                                                 | 4.954  | 4.91E-03 |
| Bt.9807.3.S1_at    | <i>LGMN</i>                                                                                                                                                           | legumain                                                                            | NM_174101                                                                                    | 2.010  | 5.06E-03 |
| Bt.2515.1.S1_at    | <i>LIG1</i>                                                                                                                                                           | ligase I, DNA, ATP-dependent                                                        | NM_001102548                                                                                 | -2.004 | 1.43E-02 |
| Bt.28346.2.S1_a_at | <i>LIPG</i>                                                                                                                                                           | lipase, endothelial                                                                 | XM_586851                                                                                    | -2.201 | 3.34E-02 |
| Bt.2529.1.S1_at    | <i>LMNB1</i>                                                                                                                                                          | lamin B1                                                                            | NM_001103295                                                                                 | -3.670 | 6.90E-03 |
| Bt.23106.1.S1_at   | <i>LOC100138846</i><br>/// <i>LOC784932</i> ///<br><i>LOC784964</i> ///<br><i>SERPINA3</i> ///<br><i>SERPINA3-1</i> ///<br><i>SERPINA3-2</i> ///<br><i>SERPINA3-7</i> | similar to endopin 2C /// similar to endopin 2B<br>/// similar to Endopin 1b /// se | NM_001012283 ///<br>NM_001081744 ///<br>NM_001146301 ///<br>NM_174768 ///<br>XM_001252646 // | -2.137 | 4.75E-02 |
| Bt.28430.1.S1_at   | <i>LOC100139092</i>                                                                                                                                                   | similar to Probable G-protein coupled receptor<br>34                                | XR_042936                                                                                    | 2.090  | 2.12E-02 |

|                  |                                                                                                                     |                                                                                  |                                                                                  |        |          |
|------------------|---------------------------------------------------------------------------------------------------------------------|----------------------------------------------------------------------------------|----------------------------------------------------------------------------------|--------|----------|
| Bt.3681.1.S1_at  | <i>LOC100139766</i><br>/// <i>LOC507024</i> ///<br><i>LOC510212</i> ///<br><i>LOC618416</i> ///<br><i>LOC783134</i> | similar to immunoglobulin-like transcript 5 protein /// similar to Leukocyte imm | XM_001787794 ///<br>XM_001788788 ///<br>XM_583568 /// XR_042676<br>/// XR_042799 | 2.159  | 9.69E-03 |
| Bt.21159.1.S1_at | <i>LOC100302527</i>                                                                                                 | hypothetical protein LOC100302527                                                | NM_001163442                                                                     | -2.066 | 7.71E-03 |
| Bt.26604.2.S1_at | <i>LOC504773</i>                                                                                                    | regakine 1                                                                       | NM_001034220                                                                     | 4.946  | 4.91E-03 |
| Bt.28741.2.S1_at | <i>LOC507141</i>                                                                                                    | CE5 protein-like                                                                 | XM_583699                                                                        | 2.298  | 2.03E-02 |
| Bt.10391.1.S1_at | <i>LOC509513</i> ///<br><i>TRB@</i>                                                                                 | hypothetical LOC509513 /// T cell receptor, beta cluster                         | NM_001080904                                                                     | 2.213  | 3.20E-02 |
| Bt.23779.1.A1_at | <i>LOC513508</i>                                                                                                    | similar to acyl-Coenzyme A dehydrogenase family, member 10                       | XM_001788744                                                                     | 2.123  | 2.61E-02 |
| Bt.1440.1.S1_at  | <i>LOC513587</i>                                                                                                    | Similar to UPF0474 protein C5orf41                                               | XM_876203                                                                        | 2.463  | 5.53E-03 |
| Bt.26046.1.A1_at | <i>LOC513587</i>                                                                                                    | Similar to UPF0474 protein C5orf41                                               | XM_876203                                                                        | 2.101  | 8.57E-03 |
| Bt.22120.1.S1_at | <i>LOC516579</i>                                                                                                    | similar to ATPase, Class II, type 9A                                             | XR_028542                                                                        | 2.519  | 1.31E-02 |
| Bt.13458.1.S1_at | <i>LOC518821</i>                                                                                                    | similar to Centromeric protein E (CENP-E)                                        | XR_027308                                                                        | -4.967 | 4.91E-03 |
| Bt.3017.1.S1_at  | <i>LOC521099</i>                                                                                                    | similar to family with sequence similarity 20, member A                          | XM_599356                                                                        | 2.025  | 1.63E-02 |

|                    |                  |                                                                                  |                                  |        |          |
|--------------------|------------------|----------------------------------------------------------------------------------|----------------------------------|--------|----------|
| Bt.11525.2.A1_at   | <i>LOC529947</i> | similar to signal peptide, CUB domain, EGF-like 2                                | XM_608409                        | 3.166  | 5.24E-03 |
| Bt.28162.3.S1_at   | <i>LOC530077</i> | similar to GTPase, IMAP family member 5                                          | XM_864682                        | 2.181  | 1.41E-02 |
| Bt.25773.1.A1_at   | <i>LOC535166</i> | similar to mKIAA1077 protein                                                     | XR_027912                        | 2.621  | 1.13E-02 |
| Bt.21087.1.A1_at   | <i>LOC539596</i> | similar to Transforming growth factor-beta induced protein IG-H3 precursor (Beta | XR_028016                        | 2.121  | 5.68E-03 |
| Bt.1296.1.S1_at    | <i>LOC540455</i> | hypothetical protein LOC540455                                                   | NM_001099109                     | -7.261 | 4.91E-03 |
| Bt.15856.1.S1_at   | <i>LOC614351</i> | similar to DNA replication complex GINS protein PSF2                             | XM_865829                        | -2.170 | 1.58E-02 |
| Bt.26968.1.S1_at   | <i>LOC615685</i> | UPF0452 protein C7orf41 homolog                                                  | NM_001101246                     | 2.063  | 9.41E-03 |
| Bt.14166.2.S1_at   | <i>LOC617744</i> | hypothetical LOC617744                                                           | XR_043042                        | 2.202  | 1.24E-02 |
| Bt.24411.1.A1_at   | <i>LOC618360</i> | similar to Nitric oxide-inducible gene protein                                   | XM_870692                        | -2.261 | 2.07E-02 |
| Bt.22390.2.S1_at   | <i>LOC618591</i> | similar to NKp80 NK receptor                                                     | NM_001101276                     | 2.249  | 4.91E-03 |
| Bt.10236.1.S1_at   | <i>LOC782922</i> | similar to prostaglandin F synthetase II                                         | NM_001166224 ///<br>XM_001250622 | 2.216  | 9.48E-03 |
| Bt.20074.1.S1_a_at | <i>LOC783399</i> | major allergen Equ c 1-like                                                      | XM_001252015                     | 3.292  | 1.65E-02 |

|                  |                                  |                                                                                  |                                  |        |          |
|------------------|----------------------------------|----------------------------------------------------------------------------------|----------------------------------|--------|----------|
| Bt.26604.1.S1_at | <i>LOC784007</i>                 | Similar to LOC496253 protein                                                     | XM_001252441                     | 2.986  | 5.35E-03 |
| Bt.20570.1.S1_at | <i>LOC784034</i>                 | similar to Uncharacterized protein C1orf112 homolog                              | XM_001252463                     | -2.371 | 1.95E-02 |
| Bt.15587.1.S1_at | <i>LSM4</i>                      | LSM4 homolog, U6 small nuclear RNA associated ( <i>S. cerevisiae</i> )           | NM_001035436                     | -2.010 | 1.38E-02 |
| Bt.24813.1.A1_at | <i>LTF</i>                       | lactotransferrin                                                                 | NM_180998                        | 2.303  | 2.95E-02 |
| Bt.14379.2.S1_at | <i>LY9</i>                       | lymphocyte antigen 9                                                             | NM_001075918                     | 2.179  | 1.03E-02 |
| Bt.20778.3.A1_at | <i>MAD2</i> ///<br><i>MAD2L1</i> | mitotic checkpoint component Mad2 /// MAD2 mitotic arrest deficient-like 1 (yeas | NM_001079796 ///<br>XM_001254565 | -3.409 | 1.09E-02 |
| Bt.1929.1.S1_at  | <i>MAGOHB</i>                    | mago-nashi homolog B ( <i>Drosophila</i> )                                       | NM_001076252                     | -2.096 | 7.45E-03 |
| Bt.5819.1.S1_at  | <i>MANF</i>                      | mesencephalic astrocyte-derived neurotrophic factor                              | NM_001101211                     | -2.191 | 6.90E-03 |
| Bt.13413.1.S1_at | <i>MAOB</i>                      | monoamine oxidase B                                                              | NM_177944                        | 2.567  | 2.33E-02 |
| Bt.858.1.S1_at   | <i>MCM2</i>                      | similar to KIAA0030                                                              | XM_864352                        | -2.501 | 2.94E-02 |
| Bt.27090.1.S1_at | <i>MCM3</i>                      | minichromosome maintenance complex component 3                                   | NM_001013586                     | -3.118 | 2.43E-02 |
| Bt.25834.1.A1_at | <i>MCM4</i>                      | minichromosome maintenance complex component 4                                   | NM_001075158                     | -3.387 | 1.63E-02 |

|                  |                |                                                       |                                  |        |          |
|------------------|----------------|-------------------------------------------------------|----------------------------------|--------|----------|
| Bt.21607.1.S1_at | <i>MCM5</i>    | minichromosome maintenance complex component 5        | NM_001075290                     | -2.408 | 1.40E-02 |
| Bt.13480.1.S1_at | <i>MCM6</i>    | minichromosome maintenance complex component 6        | NM_001046234                     | -2.159 | 2.45E-02 |
| Bt.3804.1.S1_at  | <i>MELK</i>    | maternal embryonic leucine zipper kinase              | NM_001111260 ///<br>XM_001787811 | -4.538 | 7.85E-03 |
| Bt.639.1.S1_at   | <i>MERTK</i>   | c-mer proto-oncogene tyrosine kinase                  | XM_580552                        | 2.767  | 4.53E-03 |
| Bt.1416.1.S1_at  | <i>MMP19</i>   | matrix metalloproteinase 19                           | NM_001075983                     | 2.974  | 8.58E-03 |
| Bt.21408.1.S1_at | <i>MOBKL2B</i> | MOB1, Mps One Binder kinase activator-like 2B (yeast) | NM_001046491                     | 2.186  | 1.68E-02 |
| Bt.5993.1.S1_at  | <i>MPEG1</i>   | macrophage expressed 1                                | NM_001046464                     | 2.591  | 5.16E-03 |
| Bt.22117.1.S1_at | <i>MRC1L1</i>  | mannose receptor, C type 1-like 1                     | XM_001252128                     | 2.500  | 5.88E-03 |
| Bt.6537.1.S1_at  | <i>MRC1L1</i>  | mannose receptor, C type 1-like 1                     | XM_001252128                     | 2.419  | 1.46E-02 |
| Bt.20574.1.S1_at | <i>MRPL15</i>  | mitochondrial ribosomal protein L15                   | NM_001075445                     | -2.010 | 2.41E-02 |
| Bt.12217.2.S1_at | <i>MSR1</i>    | macrophage scavenger receptor 1                       | NM_001113240 ///<br>NM_174113    | 3.375  | 4.91E-03 |
| Bt.17179.1.S1_at | <i>MT2A</i>    | metallothionein 2A                                    | NM_001075140 ///<br>XM_586929    | 2.740  | 2.73E-02 |



|                  |                |                                                                                  |              |        |          |
|------------------|----------------|----------------------------------------------------------------------------------|--------------|--------|----------|
| Bt.7670.1.A1_at  | <i>MTHFD1</i>  | methylenetetrahydrofolate dehydrogenase (NADP+ dependent) 1, methenyltetrahydrof | NM_001083477 | -2.034 | 1.24E-02 |
| Bt.28142.1.S1_at | <i>MXD3</i>    | MAX dimerization protein 3                                                       | XM_883278    | -3.018 | 4.91E-03 |
| Bt.29925.1.S1_at | <i>MXII</i>    | MAX interactor 1                                                                 | NM_001076331 | 2.073  | 1.32E-02 |
| Bt.27319.2.S1_at | <i>MXII</i>    | MAX interactor 1                                                                 | NM_001076331 | 2.027  | 9.97E-03 |
| Bt.29923.1.S1_at | <i>MXRA8</i>   | matrix-remodelling associated 8                                                  | NM_001075830 | 2.511  | 9.50E-03 |
| Bt.8803.1.A1_at  | <i>MYBL2</i>   | v-myb myeloblastosis viral oncogene homolog (avian)-like 2                       | NM_001075448 | -2.117 | 7.58E-03 |
| Bt.2806.1.S1_at  | <i>MYH11</i>   | myosin, heavy chain 11, smooth muscle                                            | NM_001102127 | 2.160  | 4.77E-02 |
| Bt.1577.1.S1_at  | <i>N4BP2L1</i> | NEDD4 binding protein 2-like 1                                                   | NM_001046574 | 2.222  | 1.80E-02 |
| Bt.28266.1.A1_at | <i>NCAPD3</i>  | non-SMC condensin II complex, subunit D3                                         | XM_868423    | -2.036 | 1.16E-02 |
| Bt.6129.1.S1_at  | <i>NCAPG</i>   | non-SMC condensin I complex, subunit G                                           | NM_001102376 | -3.984 | 4.91E-03 |
| Bt.11129.1.S1_at | <i>NCAPG2</i>  | non-SMC condensin II complex, subunit G2                                         | XM_594801    | -3.184 | 1.73E-02 |
| Bt.28960.1.A1_at | <i>NCAPH</i>   | non-SMC condensin I complex, subunit H                                           | NM_001034213 | -2.104 | 1.52E-02 |

|                  |              |                                                                            |                                          |        |          |
|------------------|--------------|----------------------------------------------------------------------------|------------------------------------------|--------|----------|
| Bt.28797.1.A1_at | <i>NCAPH</i> | non-SMC condensin I complex, subunit H                                     | NM_001034213                             | -4.593 | 5.90E-03 |
| Bt.2913.1.A1_at  | <i>NDC80</i> | NDC80 homolog, kinetochore complex component ( <i>S. cerevisiae</i> )      | XM_582722                                | -4.151 | 5.98E-03 |
| Bt.7035.2.S1_at  | <i>NDRG1</i> | N-myc downstream regulated 1                                               | NM_001035009                             | 2.214  | 4.91E-03 |
| Bt.13330.2.A1_at | <i>NKG7</i>  | natural killer cell group 7 sequence                                       | NM_001035279                             | 2.157  | 4.91E-03 |
| Bt.20074.2.S1_at | <i>NOL3</i>  | nucleolar protein 3 (apoptosis repressor with CARD domain)                 | NM_001083688                             | 2.950  | 4.55E-03 |
| Bt.22759.1.S1_at | <i>NOL3</i>  | nucleolar protein 3 (apoptosis repressor with CARD domain)                 | NM_001083688                             | 2.038  | 1.05E-02 |
| Bt.9538.1.S1_at  | <i>NPL</i>   | N-acetylneuraminate pyruvate lyase (dihydrodipicolinate synthase)          | NM_001045978                             | 2.238  | 4.66E-03 |
| Bt.4374.1.S1_at  | <i>NRM</i>   | nurim (nuclear envelope membrane protein)                                  | NM_001037596                             | -2.223 | 4.91E-03 |
| Bt.28502.1.S1_at | <i>NRP2</i>  | neuropilin 2                                                               | XM_614062 /// XM_865994<br>/// XM_877502 | 2.594  | 4.91E-03 |
| Bt.4670.1.S1_at  | <i>NRP2</i>  | neuropilin 2                                                               | XM_614062 /// XM_865994<br>/// XM_877502 | 2.489  | 1.17E-02 |
| Bt.4010.1.S1_at  | <i>NRP2</i>  | neuropilin 2                                                               | XM_614062 /// XM_865994<br>/// XM_877502 | 2.083  | 7.71E-03 |
| Bt.14005.1.S1_at | <i>NSL1</i>  | NSL1, MIND kinetochore complex component, homolog ( <i>S. cerevisiae</i> ) | NM_001101876                             | -2.002 | 2.73E-02 |

|                    |               |                                                       |                               |        |          |
|--------------------|---------------|-------------------------------------------------------|-------------------------------|--------|----------|
| Bt.12217.3.A1_at   | <i>NTRK2</i>  | Neurotrophic tyrosine kinase, receptor, type 2        | NM_001075225                  | 4.448  | 3.11E-02 |
| Bt.22430.1.A1_at   | <i>NTRK2</i>  | Neurotrophic tyrosine kinase, receptor, type 2        | NM_001075225                  | 3.828  | 3.02E-02 |
| Bt.4902.1.S1_at    | <i>NTRK2</i>  | neurotrophic tyrosine kinase, receptor, type 2        | NM_001075225                  | 2.730  | 2.07E-02 |
| Bt.26155.1.A1_at   | <i>NUPRI</i>  | nuclear protein, transcriptional regulator, 1         | NM_001114515 ///<br>XM_867457 | 3.544  | 6.27E-03 |
| Bt.27531.1.A1_at   | <i>NUSAP1</i> | nucleolar and spindle associated protein 1            | NM_001046571                  | -5.067 | 5.06E-03 |
| Bt.24844.1.S1_at   | <i>OIP5</i>   | Opa interacting protein 5                             | XM_588370                     | -3.765 | 8.94E-03 |
| Bt.20397.1.S1_at   | <i>OIT3</i>   | oncoprotein induced transcript 3                      | NM_001046064                  | -3.856 | 5.16E-03 |
| Bt.26309.1.A1_at   | <i>ORC1L</i>  | origin recognition complex, subunit 1-like<br>(yeast) | NM_001014918                  | -2.617 | 2.18E-02 |
| Bt.21343.2.A1_a_at | <i>OSMR</i>   | oncostatin M receptor                                 | NM_001080272                  | 2.378  | 1.54E-02 |
| Bt.23089.1.S1_at   | <i>OSMR</i>   | oncostatin M receptor                                 | NM_001080272                  | 2.342  | 1.24E-02 |
| Bt.26855.1.S1_at   | <i>PAF</i>    | KIAA0101 protein                                      | NM_001015678                  | -6.987 | 5.24E-03 |
| Bt.3537.1.S1_at    | <i>PARP12</i> | poly (ADP-ribose) polymerase family, member<br>12     | XM_590833                     | 2.033  | 4.55E-03 |

|                    |                |                                                           |                                                                                              |        |          |
|--------------------|----------------|-----------------------------------------------------------|----------------------------------------------------------------------------------------------|--------|----------|
| Bt.5278.2.S1_at    | <i>PCDH7</i>   | protocadherin 7                                           | XM_864701                                                                                    | -2.115 | 3.38E-02 |
| Bt.28062.1.S1_at   | <i>PCNA</i>    | proliferating cell nuclear antigen                        | NM_001034494                                                                                 | -2.596 | 1.58E-02 |
| Bt.12606.1.S1_a_at | <i>PCOLCE2</i> | procollagen C-endopeptidase enhancer 2                    | NM_001075629                                                                                 | 2.143  | 3.25E-02 |
| Bt.26890.1.S1_at   | <i>PDK4</i>    | pyruvate dehydrogenase kinase, isozyme 4                  | NM_001101883                                                                                 | 2.200  | 9.16E-03 |
| Bt.16687.1.A1_at   | <i>PDK4</i>    | pyruvate dehydrogenase kinase, isozyme 4                  | NM_001101883                                                                                 | 2.045  | 8.36E-03 |
| Bt.1343.1.S1_at    | <i>PDPN</i>    | podoplanin                                                | NM_001033120                                                                                 | 2.138  | 5.84E-03 |
| Bt.3532.1.A1_at    | <i>PHGDH</i>   | phosphoglycerate dehydrogenase                            | NM_001035017                                                                                 | -2.659 | 5.35E-03 |
| Bt.22969.1.S1_at   | <i>PID1</i>    | phosphotyrosine interaction domain containing 1           | NM_001079584                                                                                 | 2.993  | 9.50E-03 |
| Bt.16725.1.S1_at   | <i>PKIB</i>    | protein kinase (cAMP-dependent, catalytic) inhibitor beta | NM_001114518 ///<br>XM_001788472 ///<br>XM_001788483 ///<br>XM_001788486 ///<br>XM_001788495 | 4.523  | 6.90E-03 |
| Bt.41.1.S1_at      | <i>PLA1A</i>   | phospholipase A1 member A                                 | NM_001015610                                                                                 | 2.801  | 4.91E-03 |
| Bt.22385.2.S1_a_at | <i>PLA1A</i>   | phospholipase A1 member A                                 | NM_001015610                                                                                 | 2.354  | 4.91E-03 |

|                  |               |                                                    |              |        |          |
|------------------|---------------|----------------------------------------------------|--------------|--------|----------|
| Bt.13583.1.A1_at | <i>PLIN5</i>  | perilipin 5                                        | NM_001101136 | -2.209 | 1.94E-02 |
| Bt.14219.1.S1_at | <i>PLK1</i>   | polo-like kinase 1 (Drosophila)                    | NM_001038173 | -2.332 | 7.87E-03 |
| Bt.23094.4.S1_at | <i>PLN</i>    | phospholamban                                      | NM_001103319 | 2.174  | 5.02E-03 |
| Bt.13330.1.S1_at | <i>PLXNC1</i> | plexin C1                                          | XM_596354    | 2.148  | 1.00E-02 |
| Bt.4995.2.S1_at  | <i>POLE2</i>  | polymerase (DNA directed), epsilon 2 (p59 subunit) | NM_001105383 | -2.562 | 2.69E-02 |
| Bt.3734.1.A1_at  | <i>PPA1</i>   | pyrophosphatase (inorganic) 1                      | NM_001075118 | -2.059 | 2.79E-02 |
| Bt.12087.1.A1_at | <i>PRC1</i>   | protein regulator of cytokinesis 1                 | NM_001076543 | -4.719 | 5.24E-03 |
| Bt.864.2.S1_at   | <i>PRDMI</i>  | PR domain containing 1, with ZNF domain            | XM_618588    | 2.180  | 5.45E-03 |
| Bt.4482.1.S1_at  | <i>PSAT1</i>  | phosphoserine aminotransferase 1                   | NM_001102150 | -2.096 | 1.44E-02 |
| Bt.15725.1.A1_at | <i>PSRC1</i>  | proline/serine-rich coiled-coil 1                  | NM_001046501 | -2.254 | 7.17E-03 |
| Bt.18316.2.S1_at | <i>PTGDS</i>  | prostaglandin D2 synthase 21kDa (brain)            | NM_174791    | 2.199  | 2.04E-02 |
| Bt.23668.1.A1_at | <i>PTGER4</i> | prostaglandin E receptor 4 (subtype EP4)           | NM_174589    | 2.548  | 9.71E-03 |

|                  |                 |                                                 |                               |        |          |
|------------------|-----------------|-------------------------------------------------|-------------------------------|--------|----------|
| Bt.18776.1.S1_at | <i>PTTG1</i>    | pituitary tumor-transforming 1                  | NM_001034310                  | -6.471 | 5.16E-03 |
| Bt.13134.1.S1_at | <i>RACGAP1</i>  | Rac GTPase activating protein 1                 | XM_592496                     | -3.196 | 5.41E-03 |
| Bt.25412.1.A1_at | <i>RAD51AP1</i> | RAD51 associated protein 1                      | NM_001076403                  | -5.508 | 7.64E-03 |
| Bt.8939.1.S1_at  | <i>RASGEF1B</i> | RasGEF domain family, member 1B                 | NM_001083649                  | 2.664  | 5.99E-03 |
| Bt.27087.1.A1_at | <i>RBM5</i>     | RNA binding motif protein 5                     | NM_001046374                  | 2.686  | 3.63E-02 |
| Bt.18557.1.S1_at | <i>RBPMS</i>    | RNA binding protein with multiple splicing      | NM_001046535                  | 2.299  | 4.83E-03 |
| Bt.5506.1.A1_at  | <i>RDMI</i>     | RAD52 motif 1                                   | XM_591173                     | -2.110 | 1.79E-02 |
| Bt.29403.1.S1_at | <i>RENBP</i>    | renin binding protein                           | NM_001046223 ///<br>XM_594363 | 2.223  | 7.64E-03 |
| Bt.19884.1.A1_at | <i>RGS1</i>     | regulator of G-protein signaling 1              | XM_001252887                  | 3.006  | 3.63E-02 |
| Bt.6980.1.S1_at  | <i>RGS2</i>     | regulator of G-protein signaling 2, 24kDa       | NM_001075596                  | 2.671  | 1.76E-02 |
| Bt.27645.1.A1_at | <i>RMI2</i>     | chromosome 16 open reading frame 75<br>ortholog | NM_001099720                  | -2.718 | 2.29E-02 |
| Bt.6406.1.S2_at  | <i>RNASE6</i>   | ribonuclease, RNase A family, k6                | NM_174594                     | 2.031  | 2.64E-02 |

|                  |                |                                                           |                               |        |          |
|------------------|----------------|-----------------------------------------------------------|-------------------------------|--------|----------|
| Bt.20027.1.S1_at | <i>RPA2</i>    | replication protein A2, 32kDa                             | NM_001045984                  | -2.017 | 4.18E-02 |
| Bt.19567.2.S1_at | <i>RPA3</i>    | replication protein A3, 14kDa                             | NM_001034427                  | -2.309 | 6.27E-03 |
| Bt.26507.1.S1_at | <i>RRAD</i>    | Ras-related associated with diabetes                      | NM_001045913                  | 2.171  | 2.20E-02 |
| Bt.24859.1.A1_at | <i>RRM1</i>    | ribonucleotide reductase M1                               | NM_001113296 ///<br>XM_879432 | -2.021 | 2.61E-02 |
| Bt.20277.1.S1_at | <i>RRM2</i>    | ribonucleotide reductase M2 polypeptide                   | XM_584910 /// XM_875690       | -5.660 | 7.87E-03 |
| Bt.2113.1.S1_at  | <i>RTP4</i>    | receptor (chemosensory) transporter protein 4             | NM_001075961                  | 2.302  | 4.55E-03 |
| Bt.16049.1.S1_at | <i>RYR2</i>    | ryanodine receptor 2 (cardiac)                            | XM_001788290                  | 2.410  | 3.25E-02 |
| Bt.8633.1.A1_at  | <i>S100A13</i> | 8KDa amlexanox-binding protein                            | NM_205800                     | 2.527  | 6.41E-03 |
| Bt.7467.1.S1_at  | <i>S100A2</i>  | S100 calcium binding protein A2                           | NM_001034367                  | -2.254 | 5.74E-03 |
| Bt.27140.1.S1_at | <i>SAA3</i>    | serum amyloid A 3                                         | NM_181016                     | 5.852  | 4.16E-02 |
| Bt.12328.1.S1_at | <i>SAMSN1</i>  | SAM domain, SH3 domain and nuclear localization signals 1 | NM_001035404                  | 2.855  | 4.83E-03 |
| Bt.24258.1.S1_at | <i>SAMSN1</i>  | SAM domain, SH3 domain and nuclear localization signals 1 | NM_001035404                  | 2.476  | 4.91E-03 |

|                  |                 |                                                              |              |        |          |
|------------------|-----------------|--------------------------------------------------------------|--------------|--------|----------|
| Bt.1377.1.S1_at  | <i>SERPING1</i> | serpin peptidase inhibitor, clade G (C1 inhibitor), member 1 | NM_174821    | 3.931  | 4.91E-03 |
| Bt.393.1.S1_at   | <i>SERPING1</i> | serpin peptidase inhibitor, clade G (C1 inhibitor), member 1 | NM_174821    | 3.662  | 4.91E-03 |
| Bt.7962.1.S1_at  | <i>SFRS1</i>    | splicing factor, arginine/serine-rich 1                      | NM_001076394 | -2.294 | 7.57E-03 |
| Bt.7870.1.S1_at  | <i>SGOL1</i>    | shugoshin-like 1 ( <i>S. pombe</i> )                         | NM_001081617 | -3.793 | 7.72E-03 |
| Bt.3756.1.A1_at  | <i>SHCBP1</i>   | SHC SH2-domain binding protein 1                             | XM_601664    | -5.840 | 5.24E-03 |
| Bt.15231.1.S1_at | <i>SHISA2</i>   | shisa homolog 2 ( <i>Xenopus laevis</i> )                    | NM_001101265 | 2.184  | 3.46E-02 |
| Bt.6038.1.S1_at  | <i>SIGLEC1</i>  | sialic acid binding Ig-like lectin 1, sialoadhesin           | XM_870818    | 2.234  | 7.41E-03 |
| Bt.27212.1.A1_at | <i>SKA1</i>     | spindle and kinetochore associated complex subunit 1         | NM_001075327 | -4.355 | 6.57E-03 |
| Bt.1645.1.S1_at  | <i>SKA3</i>     | spindle and kinetochore associated complex subunit 3         | NM_001110067 | -2.962 | 1.95E-02 |
| Bt.1088.2.S1_at  | <i>SKA3</i>     | spindle and kinetochore associated complex subunit 3         | NM_001110067 | -3.281 | 9.29E-03 |
| Bt.6817.1.S1_at  | <i>SLAMF7</i>   | SLAM family member 7                                         | XM_001790094 | 2.676  | 5.24E-03 |
| Bt.27837.1.S1_at | <i>SLAMF9</i>   | SLAM family member 9                                         | XM_864973    | 2.077  | 4.55E-03 |



|                    |                |                                                                                  |                               |        |          |
|--------------------|----------------|----------------------------------------------------------------------------------|-------------------------------|--------|----------|
| Bt.25039.1.S1_at   | <i>SLC11A1</i> | solute carrier family 11 (proton-coupled divalent metal ion transporters), membe | NM_174652                     | 2.189  | 2.54E-02 |
| Bt.15731.1.A1_at   | <i>SLC16A1</i> | solute carrier family 16, member 1 (monocarboxylic acid transporter 1)           | NM_001037319                  | -2.264 | 1.79E-02 |
| Bt.3100.1.A1_at    | <i>SLC24A6</i> | solute carrier family 24 (sodium/potassium/calcium exchanger), member 6          | NM_001177596 ///<br>XM_585733 | 2.045  | 5.81E-03 |
| Bt.7264.1.S1_at    | <i>SLC31A2</i> | solute carrier family 31 (copper transporters), member 2                         | NM_001034556                  | 2.177  | 4.55E-03 |
| Bt.3211.1.S2_at    | <i>SLC40A1</i> | solute carrier family 40 (iron-regulated transporter), member 1                  | NM_001077970                  | 2.123  | 1.04E-02 |
| Bt.6397.2.S1_at    | <i>SLC7A7</i>  | solute carrier family 7 (cationic amino acid transporter, y+ system), member 7   | NM_001075151                  | 2.650  | 5.16E-03 |
| Bt.16538.1.S1_at   | <i>SLCO2A1</i> | solute carrier organic anion transporter family, member 2A1                      | NM_174829                     | -2.210 | 7.87E-03 |
| Bt.13537.1.A1_at   | <i>SMC2</i>    | structural maintenance of chromosomes 2                                          | XM_585705                     | -2.504 | 3.59E-02 |
| Bt.15534.1.S1_a_at | <i>SMC4</i>    | structural maintenance of chromosomes 4                                          | NM_001105326                  | -2.313 | 6.57E-03 |
| Bt.1920.1.S1_at    | <i>SMOC2</i>   | SPARC related modular calcium binding 2                                          | NM_001098134                  | 2.585  | 2.08E-02 |
| Bt.15730.1.S1_at   | <i>SMOC2</i>   | SPARC related modular calcium binding 2                                          | NM_001098134                  | 2.306  | 1.96E-02 |

|                   |                   |                                                                              |                               |        |          |
|-------------------|-------------------|------------------------------------------------------------------------------|-------------------------------|--------|----------|
| Bt.20431.2.S1_at  | <i>SNHG3-RCC1</i> | SNHG3-RCC1 readthrough transcript                                            | NM_001105408                  | -2.064 | 1.02E-02 |
| Bt.9517.1.S1_a_at | <i>SNX31</i>      | sorting nexin 31                                                             | XM_001249966                  | 2.493  | 1.82E-02 |
| Bt.10696.1.S1_at  | <i>SPAG5</i>      | sperm associated antigen 5                                                   | XM_580731                     | -4.797 | 4.91E-03 |
| Bt.12236.1.S1_at  | <i>SPC24</i>      | SPC24, NDC80 kinetochore complex component, homolog ( <i>S. cerevisiae</i> ) | NM_001075391                  | -4.898 | 5.45E-03 |
| Bt.1491.1.S1_at   | <i>SPOCK2</i>     | sparc/osteonectin, cwcv and kazal-like domains proteoglycan (testican) 2     | NM_001101115                  | 3.051  | 1.32E-02 |
| Bt.28366.1.A1_at  | <i>STARD10</i>    | StAR-related lipid transfer (START) domain containing 10                     | XM_592504                     | 2.725  | 5.24E-03 |
| Bt.20014.1.S1_at  | <i>STARD10</i>    | StAR-related lipid transfer (START) domain containing 10                     | XM_592504                     | 2.432  | 6.57E-03 |
| Bt.28741.1.A1_at  | <i>STEAP1</i>     | six transmembrane epithelial antigen of the prostate 1                       | XM_593128                     | 2.449  | 3.34E-02 |
| Bt.9363.1.A1_at   | <i>STIL</i>       | SCL/TAL1 interrupting locus                                                  | XR_028515                     | -3.203 | 1.20E-02 |
| Bt.13352.2.S1_at  | <i>STRA13</i>     | stimulated by retinoic acid 13 homolog (mouse)                               | NM_001114527 ///<br>XM_870351 | -2.141 | 1.01E-02 |
| Bt.24442.1.A1_at  | <i>SULT1A1</i>    | sulfotransferase family, cytosolic, 1A, phenol-preferring, member 1          | NM_177521                     | 2.174  | 1.07E-02 |
| Bt.12924.1.S1_at  | <i>TACC3</i>      | transforming, acidic coiled-coil containing protein 3                        | NM_001100305                  | -3.679 | 6.18E-03 |

|                  |                 |                                                     |                               |        |          |
|------------------|-----------------|-----------------------------------------------------|-------------------------------|--------|----------|
| Bt.13789.1.A1_at | <i>TAGLN3</i>   | transgelin 3                                        | NM_001034499                  | -2.168 | 1.95E-02 |
| Bt.24202.1.S1_at | <i>TCF19</i>    | transcription factor 19                             | NM_001083684                  | -3.431 | 8.60E-03 |
| Bt.8003.1.A1_at  | <i>TCP11L2</i>  | t-complex 11 (mouse)-like 2                         | NM_001105431                  | 2.187  | 4.00E-02 |
| Bt.23216.1.S1_at | <i>TFF2</i>     | trefoil factor 2                                    | NM_001083521                  | -2.884 | 6.91E-03 |
| Bt.2990.1.S1_at  | <i>TGIF1</i>    | TGFB-induced factor homeobox 1                      | NM_001128499 ///<br>XM_587139 | 2.187  | 2.51E-02 |
| Bt.196.1.S1_at   | <i>TIMD4</i>    | T-cell immunoglobulin and mucin domain containing 4 | NM_001075320                  | 2.281  | 2.42E-02 |
| Bt.2899.1.S1_at  | <i>TK1</i>      | thymidine kinase 1, soluble                         | NM_001097572                  | -3.215 | 1.95E-02 |
| Bt.8957.1.S1_at  | <i>TLR7</i>     | toll-like receptor 7                                | NM_001033761                  | 2.230  | 5.16E-03 |
| Bt.2551.1.S1_at  | <i>TMEM150C</i> | transmembrane protein 150C                          | NM_001078001                  | 2.327  | 1.14E-02 |
| Bt.24687.1.A1_at | <i>TMEM150C</i> | transmembrane protein 150C                          | NM_001078001                  | 2.092  | 8.91E-03 |
| Bt.16786.1.A1_at | <i>TMEM156</i>  | transmembrane protein 156                           | NM_001083469                  | 2.349  | 5.24E-03 |
| Bt.5573.1.S1_at  | <i>TMEM88</i>   | transmembrane protein 88                            | NM_001098378                  | -2.409 | 4.91E-03 |

|                   |                                                         |                                                                  |                                                                                           |        |          |
|-------------------|---------------------------------------------------------|------------------------------------------------------------------|-------------------------------------------------------------------------------------------|--------|----------|
| Bt.2899.1.S2_at   | <i>TOP2A</i>                                            | topoisomerase (DNA) II alpha 170kDa                              | XM_001254457                                                                              | -4.452 | 5.99E-03 |
| Bt.5362.2.S1_a_at | <i>TOP2A</i>                                            | topoisomerase (DNA) II alpha 170kDa                              | XM_001254457                                                                              | -5.446 | 4.83E-03 |
| Bt.22265.1.S1_at  | <i>TPX2</i>                                             | TPX2, microtubule-associated, homolog (Xenopus laevis)           | NM_001098898                                                                              | -3.787 | 5.49E-03 |
| Bt.9777.1.S1_at   | <i>TPX2</i>                                             | TPX2, microtubule-associated, homolog (Xenopus laevis)           | NM_001098898                                                                              | -3.890 | 6.27E-03 |
| Bt.19322.1.A1_at  | <i>TRIP13</i>                                           | thyroid hormone receptor interactor 13                           | XR_027559                                                                                 | -3.769 | 1.92E-02 |
| Bt.16058.1.A1_at  | <i>TROAP</i>                                            | trophinin associated protein (tastin)                            | NM_001024477                                                                              | -2.802 | 4.55E-03 |
| Bt.4802.1.S1_at   | <i>TUBA1A</i> ///<br><i>TUBA1B</i> ///<br><i>TUBA1C</i> | tubulin, alpha 1a /// tubulin, alpha 1b ///<br>tubulin, alpha 1c | NM_001034204 ///<br>NM_001114856 ///<br>NM_001166505 ///<br>XM_001790546 ///<br>XM_876383 | -2.326 | 1.74E-02 |
| Bt.24966.1.S1_at  | <i>TYMS</i>                                             | thymidylate synthetase                                           | NM_001037816                                                                              | -2.366 | 1.70E-02 |
| Bt.1048.1.S1_at   | <i>TYROBP</i>                                           | TYRO protein tyrosine kinase binding protein                     | NM_174627                                                                                 | 3.474  | 5.16E-03 |
| Bt.15980.1.A1_at  | <i>UBE2C</i>                                            | ubiquitin-conjugating enzyme E2C                                 | NM_001037449                                                                              | -6.077 | 4.91E-03 |
| Bt.15720.1.S1_at  | <i>UBE2L6</i>                                           | ubiquitin-conjugating enzyme E2L 6                               | NM_001098917                                                                              | 2.702  | 4.55E-03 |

|                  |               |                                                   |              |        |          |
|------------------|---------------|---------------------------------------------------|--------------|--------|----------|
| Bt.5934.1.S1_at  | <i>UBE2L6</i> | ubiquitin-conjugating enzyme E2L 6                | NM_001098917 | 2.515  | 4.53E-03 |
| Bt.29203.1.A1_at | <i>UBE2S</i>  | ubiquitin-conjugating enzyme E2S                  | NM_001076472 | -2.437 | 7.61E-03 |
| Bt.25661.1.A1_at | <i>UHRF1</i>  | ubiquitin-like with PHD and ring finger domains 1 | NM_001103098 | -4.697 | 1.04E-02 |
| Bt.21513.1.A1_at | <i>UHRF1</i>  | ubiquitin-like with PHD and ring finger domains 1 | NM_001103098 | -7.020 | 7.17E-03 |
| Bt.5578.1.S1_at  | <i>VCAMI</i>  | vascular cell adhesion molecule 1                 | NM_174484    | 2.527  | 1.57E-02 |
| Bt.15925.1.S1_at | <i>VEGFA</i>  | vascular endothelial growth factor A              | NM_174216    | -2.717 | 8.94E-03 |
| Bt.28878.1.S1_at | <i>VNN1</i>   | vanin 1                                           | NM_001024556 | 2.886  | 4.85E-02 |
| Bt.19567.1.A1_at | <i>VRK1</i>   | vaccinia related kinase 1                         | NM_001038224 | -2.749 | 1.77E-02 |
| Bt.20606.2.S1_at | <i>VSIG4</i>  | V-set and immunoglobulin domain containing 4      | NM_001046529 | 2.889  | 1.54E-02 |
| Bt.11159.1.S1_at | <i>WDFY4</i>  | WDFY family member 4                              | XM_606192    | 2.164  | 4.55E-03 |
| Bt.13336.1.A1_at | <i>WIPF3</i>  | WAS/WASL interacting protein family, member 3     | XM_001254241 | 2.207  | 5.81E-03 |
| Bt.29462.1.S1_at | <i>YPEL3</i>  | yippee-like 3 (Drosophila)                        | XR_042991    | 2.830  | 1.56E-02 |

|                    |               |                                                   |              |        |          |
|--------------------|---------------|---------------------------------------------------|--------------|--------|----------|
| Bt.17157.1.A1_at   | <i>ZFP36</i>  | zinc finger protein 36, C3H type, homolog (mouse) | NM_174493    | 2.269  | 6.90E-03 |
| Bt.4441.1.S1_at    | <i>ZSWIM7</i> | zinc finger, SWIM-type containing 7               | XM_591893    | 2.282  | 1.30E-02 |
| Bt.27172.1.A1_at   | <i>ZWINT</i>  | ZW10 interactor                                   | NM_001040529 | -3.083 | 1.21E-02 |
| Bt.10855.1.S1_at   | ---           | ---                                               | ---          | 4.942  | 1.08E-02 |
| Bt.22026.1.S1_at   | ---           | ---                                               | ---          | 4.608  | 9.10E-03 |
| Bt.22366.1.S1_at   | ---           | ---                                               | ---          | 3.541  | 1.22E-02 |
| Bt.1370.1.S1_at    | ---           | ---                                               | ---          | 3.462  | 7.41E-03 |
| Bt.21238.1.S1_at   | ---           | ---                                               | ---          | 3.307  | 4.98E-03 |
| Bt.7331.1.S2_at    | ---           | ---                                               | ---          | 3.170  | 1.50E-02 |
| Bt.24247.1.S1_at   | ---           | ---                                               | ---          | 3.151  | 4.53E-03 |
| Bt.11587.3.A1_a_at | ---           | ---                                               | ---          | 3.088  | 6.32E-03 |
| Bt.12500.2.S1_a_at | ---           | ---                                               | ---          | 3.083  | 1.79E-02 |

|                    |     |     |     |       |          |
|--------------------|-----|-----|-----|-------|----------|
| Bt.26896.1.S1_at   | --- | --- | --- | 3.058 | 1.41E-02 |
| Bt.22969.1.S1_a_at | --- | --- | --- | 2.948 | 5.79E-03 |
| Bt.26521.1.S1_at   | --- | --- | --- | 2.936 | 2.07E-02 |
| Bt.26636.1.S1_at   | --- | --- | --- | 2.924 | 5.74E-03 |
| Bt.6556.1.S1_at    | --- | --- | --- | 2.884 | 2.24E-02 |
| Bt.1537.1.S1_at    | --- | --- | --- | 2.827 | 6.83E-03 |
| Bt.22491.1.A1_at   | --- | --- | --- | 2.791 | 1.71E-02 |
| Bt.18081.2.S1_at   | --- | --- | --- | 2.784 | 1.76E-02 |
| Bt.7033.1.S1_at    | --- | --- | --- | 2.752 | 6.92E-03 |
| Bt.12619.1.S1_at   | --- | --- | --- | 2.732 | 9.70E-03 |
| Bt.8947.1.S1_at    | --- | --- | --- | 2.695 | 1.94E-02 |
| Bt.26722.1.A1_a_at | --- | --- | --- | 2.676 | 1.12E-02 |

|                   |     |     |     |       |          |
|-------------------|-----|-----|-----|-------|----------|
| Bt.12718.1.A1_at  | --- | --- | --- | 2.670 | 8.51E-03 |
| Bt.13573.1.A1_at  | --- | --- | --- | 2.629 | 6.74E-03 |
| Bt.13214.1.S1_at  | --- | --- | --- | 2.581 | 1.95E-02 |
| Bt.11271.1.S1_at  | --- | --- | --- | 2.564 | 1.26E-02 |
| Bt.5262.1.S1_at   | --- | --- | --- | 2.560 | 2.03E-02 |
| Bt.24872.1.S1_at  | --- | --- | --- | 2.508 | 7.81E-03 |
| Bt.15730.2.S1_at  | --- | --- | --- | 2.469 | 5.74E-03 |
| Bt.12550.1.S1_at  | --- | --- | --- | 2.458 | 4.06E-02 |
| Bt.1858.1.A1_at   | --- | --- | --- | 2.420 | 2.85E-02 |
| Bt.20164.1.S1_at  | --- | --- | --- | 2.403 | 8.26E-03 |
| Bt.5970.1.S1_a_at | --- | --- | --- | 2.372 | 5.79E-03 |
| Bt.24461.1.A1_at  | --- | --- | --- | 2.369 | 1.95E-02 |



|                  |     |     |     |       |          |
|------------------|-----|-----|-----|-------|----------|
| Bt.1518.1.S1_at  | --- | --- | --- | 2.368 | 1.53E-02 |
| Bt.23278.1.S1_at | --- | --- | --- | 2.364 | 4.91E-03 |
| Bt.10499.1.S1_at | --- | --- | --- | 2.353 | 1.27E-02 |
| Bt.8308.2.S1_at  | --- | --- | --- | 2.353 | 1.21E-02 |
| Bt.11001.1.S1_at | --- | --- | --- | 2.344 | 9.03E-03 |
| Bt.28346.1.A1_at | --- | --- | --- | 2.332 | 1.83E-02 |
| Bt.8743.1.S1_at  | --- | --- | --- | 2.319 | 4.66E-03 |
| Bt.8308.1.A1_at  | --- | --- | --- | 2.319 | 1.64E-02 |
| Bt.4285.1.S1_at  | --- | --- | --- | 2.314 | 8.58E-03 |
| Bt.21576.1.S1_at | --- | --- | --- | 2.300 | 5.16E-03 |
| Bt.4110.1.S1_at  | --- | --- | --- | 2.293 | 2.26E-02 |
| Bt.10092.1.S1_at | --- | --- | --- | 2.293 | 1.27E-02 |

|                    |     |     |     |       |          |
|--------------------|-----|-----|-----|-------|----------|
| Bt.23597.1.S1_at   | --- | --- | --- | 2.264 | 6.57E-03 |
| Bt.13975.1.S1_a_at | --- | --- | --- | 2.243 | 1.25E-02 |
| Bt.7603.1.S1_at    | --- | --- | --- | 2.200 | 4.91E-03 |
| Bt.22390.3.A1_at   | --- | --- | --- | 2.194 | 1.39E-02 |
| Bt.9101.1.S1_at    | --- | --- | --- | 2.194 | 5.16E-03 |
| Bt.2810.1.A1_at    | --- | --- | --- | 2.186 | 1.66E-02 |
| Bt.16141.1.S1_at   | --- | --- | --- | 2.177 | 8.51E-03 |
| Bt.2629.1.S1_at    | --- | --- | --- | 2.176 | 4.70E-02 |
| Bt.25305.1.A1_at   | --- | --- | --- | 2.147 | 4.55E-03 |
| Bt.19267.1.A1_at   | --- | --- | --- | 2.139 | 4.69E-02 |
| Bt.20308.1.S1_at   | --- | --- | --- | 2.123 | 3.56E-02 |
| Bt.4001.1.S1_at    | --- | --- | --- | 2.113 | 4.47E-02 |

|                    |     |     |     |       |          |
|--------------------|-----|-----|-----|-------|----------|
| Bt.23514.1.S1_at   | --- | --- | --- | 2.097 | 6.65E-03 |
| Bt.21047.1.A1_at   | --- | --- | --- | 2.094 | 2.11E-02 |
| Bt.24760.1.S1_at   | --- | --- | --- | 2.084 | 5.16E-03 |
| Bt.27356.1.S1_at   | --- | --- | --- | 2.061 | 5.24E-03 |
| Bt.22379.1.S1_at   | --- | --- | --- | 2.058 | 1.58E-02 |
| Bt.14576.1.A1_at   | --- | --- | --- | 2.054 | 5.88E-03 |
| Bt.28439.1.S1_a_at | --- | --- | --- | 2.053 | 1.31E-02 |
| Bt.27328.1.S1_at   | --- | --- | --- | 2.045 | 1.01E-02 |
| Bt.9662.1.S1_at    | --- | --- | --- | 2.038 | 1.91E-02 |
| Bt.14379.1.A1_at   | --- | --- | --- | 2.037 | 1.47E-02 |
| Bt.19757.1.A1_at   | --- | --- | --- | 2.023 | 8.51E-03 |
| Bt.5392.1.S1_at    | --- | --- | --- | 2.015 | 1.54E-02 |

|                    |     |     |     |        |          |
|--------------------|-----|-----|-----|--------|----------|
| Bt.12986.1.S1_at   | --- | --- | --- | 2.011  | 1.31E-02 |
| Bt.14166.1.A1_at   | --- | --- | --- | 2.011  | 9.49E-03 |
| Bt.29271.1.A1_at   | --- | --- | --- | 2.007  | 5.53E-03 |
| Bt.24927.1.A1_at   | --- | --- | --- | 2.006  | 9.95E-03 |
| Bt.13588.3.A1_at   | --- | --- | --- | 2.001  | 2.77E-02 |
| Bt.22314.1.S1_at   | --- | --- | --- | -2.021 | 7.41E-03 |
| Bt.14026.1.A1_at   | --- | --- | --- | -2.024 | 1.08E-02 |
| Bt.1130.1.S1_at    | --- | --- | --- | -2.036 | 6.74E-03 |
| Bt.27997.1.S1_at   | --- | --- | --- | -2.056 | 6.44E-03 |
| Bt.11993.1.S1_at   | --- | --- | --- | -2.057 | 2.00E-02 |
| Bt.12576.3.S1_a_at | --- | --- | --- | -2.081 | 5.26E-03 |
| Bt.6133.2.A1_at    | --- | --- | --- | -2.090 | 1.85E-02 |

|                    |     |     |     |        |          |
|--------------------|-----|-----|-----|--------|----------|
| Bt.12610.1.A1_at   | --- | --- | --- | -2.096 | 3.77E-02 |
| Bt.21820.1.S1_at   | --- | --- | --- | -2.127 | 2.30E-02 |
| Bt.6404.1.S1_at    | --- | --- | --- | -2.161 | 1.51E-02 |
| Bt.9202.1.S1_at    | --- | --- | --- | -2.171 | 1.14E-02 |
| Bt.29327.1.A1_at   | --- | --- | --- | -2.181 | 1.44E-02 |
| Bt.137.1.S1_at     | --- | --- | --- | -2.235 | 4.91E-03 |
| Bt.13954.1.S1_at   | --- | --- | --- | -2.272 | 2.54E-02 |
| Bt.17377.1.S1_at   | --- | --- | --- | -2.300 | 1.27E-02 |
| Bt.12063.1.S1_at   | --- | --- | --- | -2.352 | 2.62E-02 |
| Bt.24218.2.S1_a_at | --- | --- | --- | -2.377 | 7.14E-03 |
| Bt.287.1.S1_at     | --- | --- | --- | -2.512 | 4.53E-03 |
| Bt.23854.1.A1_at   | --- | --- | --- | -2.610 | 7.87E-03 |

|                   |     |     |     |        |          |
|-------------------|-----|-----|-----|--------|----------|
| Bt.9841.1.S1_at   | --- | --- | --- | -2.757 | 6.81E-03 |
| Bt.9577.1.S1_a_at | --- | --- | --- | -2.890 | 7.58E-03 |
| Bt.20890.1.S1_at  | --- | --- | --- | -3.257 | 6.74E-03 |
| Bt.9455.1.A1_at   | --- | --- | --- | -3.607 | 5.24E-03 |
| Bt.24288.1.A1_at  | --- | --- | --- | -3.667 | 6.57E-03 |
| Bt.26530.1.S1_at  | --- | --- | --- | -3.724 | 5.30E-03 |
| Bt.16925.1.A1_at  | --- | --- | --- | -4.071 | 5.30E-03 |
| Bt.25837.1.S1_at  | --- | --- | --- | -4.201 | 9.31E-03 |
| Bt.23271.1.A1_at  | --- | --- | --- | -4.345 | 4.83E-03 |
| Bt.10648.1.S1_at  | --- | --- | --- | -4.461 | 5.24E-03 |
| Bt.2725.1.S1_at   | --- | --- | --- | -4.564 | 6.27E-03 |
| Bt.2.1.S1_at      | --- | --- | --- | -5.436 | 6.57E-03 |

|                  |     |     |     |        |          |
|------------------|-----|-----|-----|--------|----------|
| Bt.23658.1.A1_at | --- | --- | --- | -5.989 | 5.06E-03 |
| Bt.4138.2.S1_at  | --- | --- | --- | -6.109 | 4.53E-03 |
| Bt.24827.1.A1_at | --- | --- | --- | -7.608 | 8.58E-03 |

Analysis by ANOVA in Partek, with > 2-fold change,  $P < 0.05$  (n = 543), in alphabetical order. Probe sets which do not have gene assignments were placed at the end of the list. The  $P$ -value for multiple corrections was determined by the step-up FDR method.
